# Supplementary material
Source: publisher figshare collection journal article supplement (https://acs.figshare.com/ndownloader/files/5761041)

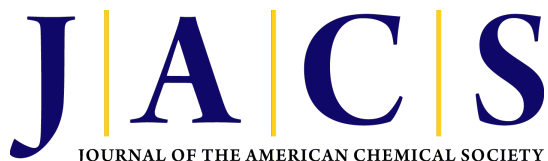

J | A | C | S  
JOURNAL OF THE AMERICAN CHEMICAL SOCIETY

J. Am. Chem. Soc., 1998, 120(46), 12069-12074, DOI: [10.1021/ja981872s](https://doi.org/10.1021/ja981872s)

#### Terms & Conditions

Electronic Supporting Information files are available without a subscription to ACS Web Editions. The American Chemical Society holds a copyright ownership interest in any copyrightable Supporting Information. Files available from the ACS website may be downloaded for personal use only. Users are not otherwise permitted to reproduce, republish, redistribute, or sell any Supporting Information from the ACS website, either in whole or in part, in either machine-readable form or any other form without permission from the American Chemical Society. For permission to reproduce, republish and redistribute this material, requesters must process their own requests via the RightsLink permission system. Information about how to use the RightsLink permission system can be found at <http://pubs.acs.org/page/copyright/permissions.html>

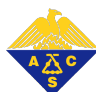

ACS Publications

MOST TRUSTED. MOST CITED. MOST READ.

Copyright © 1998 American Chemical Society

AUG 05 1998

### Synthesis of the thiols used in this study

All solvents were dried according to standard procedures. All other reagents were used as received. 4-Methylterphenyl and ethyl 4'-bromobiphenyl-4-carboxylate were prepared by published procedures.  $^1\text{H}$ -NMR and  $^{13}\text{C}$ -NMR were recorded on a Bruker AM 360 and a Varian Gemini 200, respectively. IR spectra were recorded in KBr pellets on a FT-IR-apparatus 1720 (Perkin-Elmer).

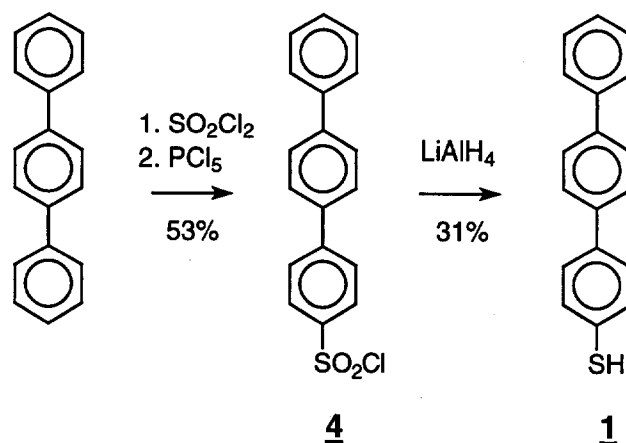

#### 4-Terphenylsulfonyl chloride (**4**)

A solution of  $\text{ClSO}_3\text{H}$  (1.6 ml, 24 mmol) in tetrachloroethane (60 ml) was added dropwise to a solution of terphenyl (4.6 g, 20 mmol) in the same solvent (130 ml) at 40–50°C. After heating to 60°C for 5 h,  $\text{PCl}_5$  (5.0 g, 24 mmol) was added and heating to 70°C was continued for another 2 h. The solvent was removed and the residue was taken up in  $\text{CH}_2\text{Cl}_2$  (50 ml) and  $\text{C}_6\text{H}_{12}$  (200 ml) and chromatographed on silica using a gradient  $\text{C}_6\text{H}_{12}/\text{CH}_2\text{Cl}_2$  (6:1  $\rightarrow$  1:1). After drying *in vacuo* a colorless powder (3.5 g, 53%) was obtained.

#### 4-Terphenylthiol (**1**)

**4** (2.0 g, 6.1 mmol) in THF (30 ml) was added dropwise to a suspension of  $\text{LiAlH}_4$  (0.65 g, 17 mmol) in THF (70 ml) under  $\text{N}_2$ . The mixture was heated to reflux for 2 h, cooled, and  $\text{H}_2\text{O}$  was added, followed by  $\text{HCl}$ . The aqueous phase was extracted several times with  $\text{CH}_2\text{Cl}_2$  and the combined organic phase was evaporated onto silica. Chromatography on silica using a gradient of petroleum ether/ $\text{CH}_2\text{Cl}_2$  (9:1  $\rightarrow$  1:1) yielded off-white leaflets (0.5 g, 31%), m.p. 236–240°C.

$^1\text{H}$  ( $\text{CDCl}_3$ ): 3.61 (s, 1 H, SH), 7.32 – 7.73 (m, 13 H, arom. H).

$^{13}\text{C}$  ( $\text{CDCl}_3$ ): 127.0, 127.2, 127.4, 127.5, 127.6, 128.8, 129.8, 129.9, 138.2, 139.2, 139.2, 140.2, 140.6.

IR: 1482, 1397, 816, 763, 691  $\text{cm}^{-1}$ .

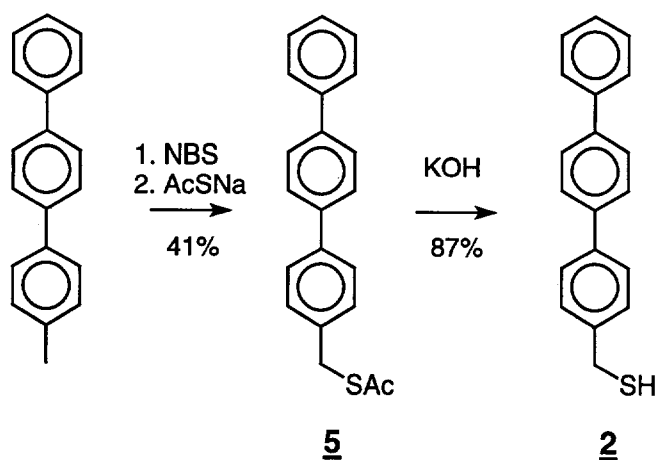

#### 4-(Thioacetylmethyl)terphenyl (**5**)

4-(Bromomethyl)terphenyl: A solution of 4-methylterphenyl (3.7 g, 15 mmol) and NBS (3.1 g, 17 mmol) in acetone (500 ml) was irradiated under N<sub>2</sub> for 4.5 h, with more NBS (0.5 g, 2.8 mmol) being added after 3 h. After evaporation to dryness, the remainder was taken up in CH<sub>2</sub>Cl<sub>2</sub> and washed three times with H<sub>2</sub>O. Filtration through silica (CH<sub>2</sub>Cl<sub>2</sub>) yielded an off-white solid (4.2 g) which was used directly for the next step.

4-(Thioacetylmethyl)terphenyl: Sodium ethanolate, made by reacting sodium (0.5 g, 22 mmol) with ethanol (20 ml) followed by removal of the solvent, was dissolved in DMF (10 ml). To this CH<sub>3</sub>COSH (3.0 ml, 42 mmol) and then a suspension of the bromomethyl compound (4.2 g, 13 mmol) in DMF (80 ml) was added. The mixture was heated to 80°C for 30 min, then the solvent was removed, and the remainder was partitioned between CH<sub>2</sub>Cl<sub>2</sub> and H<sub>2</sub>O. The organic layer was washed twice with H<sub>2</sub>O and concentrated. Chromatography on silica with a gradient C<sub>6</sub>H<sub>12</sub>/CH<sub>2</sub>Cl<sub>2</sub> (33% → 100% CH<sub>2</sub>Cl<sub>2</sub>), followed by two crystallizations from AcOH yielded brownish leaflets (2.0 g, 42%), m.p. ~195°C.

<sup>1</sup>H (CDCl<sub>3</sub>): 2.38 (s, 3 H, COCH<sub>3</sub>), 4.18 (s, 2 H, ArCH<sub>2</sub>S), 7.38 (d, J = 8 Hz, 2 H, H-3, H-5), 7.47 (t, J = 8 Hz, 1 H, H-4''), 7.58 (d, J = 8 Hz, 2 H, H-2, H-6), 7.61 - 7.69 (m, 8 H, H-2' - H-6', H-2'', H-6'').

#### Terphenylmethanethiol (**2**)

To a suspension of **5** (2.0 g, 6.3 mmol) in EtOH (50 ml) was added solid KOH (1.25 g, 26 mmol) and the mixture was heated to 70°C for 3 h. After cooling, conc. HCl (4 ml, 48 mmol) and H<sub>2</sub>O (30 ml) were added and the precipitate was filtered off and washed with H<sub>2</sub>O. After drying *in vacuo* the solid was crystallized from n-butanol to yield an off-white powder (1.5 g, 87%), m.p. 205 - 207°C.

<sup>1</sup>H (CDCl<sub>3</sub>): 1.82 (t, J = 7.7 Hz, 1 H, SH), 3.81 (d, J = 7.6 Hz, 2 H, ArCH<sub>2</sub>S), 7.35 - 7.49 (m, H, arom. H), 7.57 - 7.67 (m, H, arom. H).

<sup>13</sup>C (CDCl<sub>3</sub>): 28.7, 127.0, 127.3, 127.4, 127.5, 128.5, 128.8, 139.5, 139.6, 140.2, 140.3, 140.7.

IR: 1485, 1400, 824, 762, 691 cm<sup>-1</sup>.

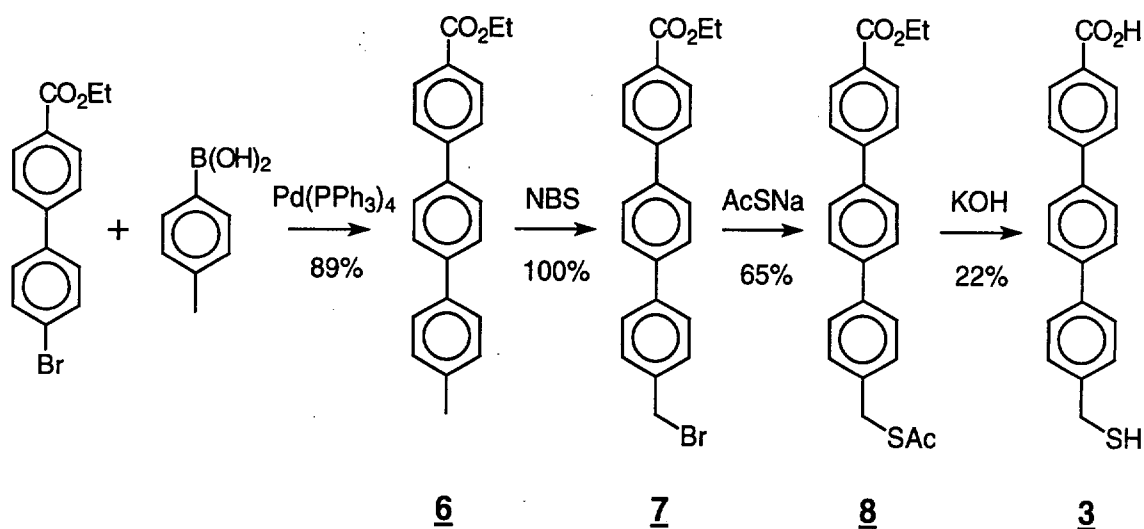

#### Ethyl 4''-methylterphenyl-4-carboxylate (**6**)

A degassed mixture of  $\text{Na}_2\text{CO}_3$  (2.2 g, 21 mmol), tris(4-methylphenyl)boroxin (1.3 g, 3.7 mmol),  $\text{Pd(PPh}_3)_4$  (0.35 g, 0.30 mmol), ethyl 4'-bromobiphenyl-4-carboxylate (3.1 g, 10 mmol),  $\text{H}_2\text{O}$  (8 ml), EtOH (8 ml), and toluene (30 ml) was stirred under  $\text{N}_2$  at  $80^\circ\text{C}$  for 16 h. After cooling, the aqueous layer was removed and the organic phase was evaporated to dryness. Chromatography on silica ( $\text{CH}_2\text{Cl}_2$ ) yielded a reddish solid, which was crystallized from methylcyclohexane to give a colorless solid (2.3 g), m.p.  $252^\circ\text{C}$ . Work up of the mother liquors yielded another 0.5 g with slightly lower m.p. (overall yield 89%).

$^1\text{H}$  ( $\text{CDCl}_3$ ): 1.42 (t,  $J = 7$  Hz, 3 H,  $\text{OCH}_2\text{CH}_3$ ), 2.41 (s, 3 H,  $\text{ArCH}_3$ ), 4.40 (q,  $J = 7$  Hz, 2 H,  $\text{OCH}_2\text{CH}_3$ ), 7.28 (d,  $J = 8$  Hz, 2 H, H-3'', H-5''), 7.55 (d,  $J = 8$  Hz, 2 H, H-2'', H-6''), 7.69 (s, 4 H, H-2' - H-6'), 7.72 (d,  $J = 8$  Hz, 2 H, H-2, H-6), 8.13 (d,  $J = 8$  Hz, 2 H, H-3, H-5).

$^{13}\text{C}$  ( $\text{CDCl}_3$ ): 14.3, 21.1, 60.9, 126.8, 127.4, 127.6, 129.6, 130.1, 137.4, 139.2, 140.9, 166.4 (not all carbon atoms were found!).

IR: 2982, 1715, 1277, 1110, 812, 772  $\text{cm}^{-1}$ .

#### Ethyl 4''-(bromomethyl)terphenyl-4-carboxylate (**7**)

**6** (2.5 g, 7.9 mmol), NBS (1.5 g, 8.4 mmol), and a few mg of AIBN were heated to reflux in  $\text{CCl}_4$  for 1 h. After 30 min, some more AIBN was added. Removal of the solvent, followed by filtration through silica ( $\text{CH}_2\text{Cl}_2$ ) yielded a colorless solid (3.1 g, 100%), m.p.  $\sim 227^\circ\text{C}$ , which was pure enough for the next step.

$^1\text{H}$  ( $\text{CDCl}_3$ ): 1.42 (t,  $J = 7.2$  Hz, 3 H,  $\text{OCH}_2\text{CH}_3$ ), 4.41 (q,  $J = 7.2$  Hz, 2 H,  $\text{OCH}_2\text{CH}_3$ ), 4.56 (s, 2 H,  $\text{ArCH}_2\text{Br}$ ), 7.49 (d,  $J = 8$  Hz, 2 H, H-3'', H-5''), 7.62 (d,  $J = 8$  Hz, 2 H, H-2'', H-6''), 7.65 - 7.73 (m, 6 H, H-2' - H-6', H-2, H-6), 8.13 (d,  $J = 8$  Hz, 2 H, H-3, H-5).

$^{13}\text{C}$  ( $\text{CDCl}_3$ ): 14.3, 33.2, 61.0, 126.8, 127.2, 127.5, 129.6, 130.1, 137.1, 139.2, 140.1, 140.5, 144.8, 166.4.

IR: 2983, 1715, 1281, 1112, 772, 740, 607  $\text{cm}^{-1}$ .

**Ethyl 4''-(thioacetylmethyl)terphenyl-4-carboxylate (**8**)**

To a solution of potassium t-butanolate (1.1 g, 9.8 mmol) in DMF (30 ml) under N<sub>2</sub>, CH<sub>3</sub>COSH (1.6 ml, 23 mmol) was quickly added, followed by a solution of **7** (3.1 g, 7.8 mmol) in DMF (30 ml). The resulting mixture was stirred at r.t. for 2 h before the solvent was removed at the same temperature. Chromatography on silica with a gradient toluene → CH<sub>2</sub>Cl<sub>2</sub>, followed by two crystallizations from toluene/methylcyclohexane 1:1, yielded an off-white powder (2.0 g, 65%), m.p. 224 - 225°C.

<sup>1</sup>H (CDCl<sub>3</sub>): 1.42 (t, J = 7.2 Hz, 3 H, OCH<sub>2</sub>CH<sub>3</sub>), 2.37 (s, 3 H, COCH<sub>3</sub>), 4.17 (s, 2 H, ArCH<sub>2</sub>S), 4.41 (q, J = 7.2 Hz, 2 H, OCH<sub>2</sub>CH<sub>3</sub>), 7.39 (d, J = 8 Hz, 2 H, H-3'', H-5''), 7.57 (d, J = 8 Hz, 2 H, H-2'', H-6''), 7.63 - 7.73 (m, 6 H, H-2' - H-6', H-2, H-6), 8.13 (d, J = 8 Hz, 2 H, H-3, H-5).

<sup>13</sup>C (CDCl<sub>3</sub>): 14.4, 30.4, 33.1, 61.0, 126.8, 127.3, 127.5, 127.6, 129.3, 130.1, 137.1, 138.9, 139.4, 140.4, 144.9, 166.5.

IR: 1709, 1690, 1274, 1107, 819, 773 cm<sup>-1</sup>.

**4-Carboxyterphenyl-4''-methanethiol (**3**)**

To a suspension of **8** (1.85 g, 4.7 mmol) in degassed EtOH (50 ml) was added KOH (1.5 g, 23 mmol). The mixture was kept at 70-80°C under N<sub>2</sub> for 18 h, cooled, and conc. HCl (5 ml, 60 mmol), followed by H<sub>2</sub>O (50 ml) was added. The precipitate was filtered off, washed with H<sub>2</sub>O and dried. Crystallisation from DMF in the presence of charcoal yielded an off white powder (0.36 g, 22%), m.p. > 300°C.

<sup>1</sup>H (DMSO-D<sub>6</sub>): 2.91 (t, J = 7 Hz, 1 H, SH), 3.78 (d, J = 7 Hz, 2 H, ArCH<sub>2</sub>S), 7.44 (d, J = 8 Hz, 2 H, H-3'', H-5''), 7.68 (d, J = 8 Hz, 2 H, H-2'', H-6''), 7.82 (s, 4 H, H-2' - H-6'), 7.83 (d, J = 8 Hz, 2 H, H-2, H-6), 8.02 (d, J = 8 Hz, 2 H, H-3, H-5).

<sup>13</sup>C (DMSO-D<sub>6</sub>): 28.7, 126.7, 127.2, 127.5, 128.9, 129.6, 130.0, 137.7, 137.8, 139.7, 141.2, 143.8, 167.1.

IR: 2668, 2547, 1683, 1606, 1430, 1298, 822, 774 cm<sup>-1</sup>.

**Results from thermal desorption spectroscopy**

**Fig.1** Thermal desorption spectrum of TFA adsorbed on a CTPMT-monolayer recorded with a heating rate of 1.3 K/s. Adsorption was carried out by exposing the substrate to 100 L (1L = 1x10<sup>-6</sup> mbar s) at a surface temperature of 150 K.

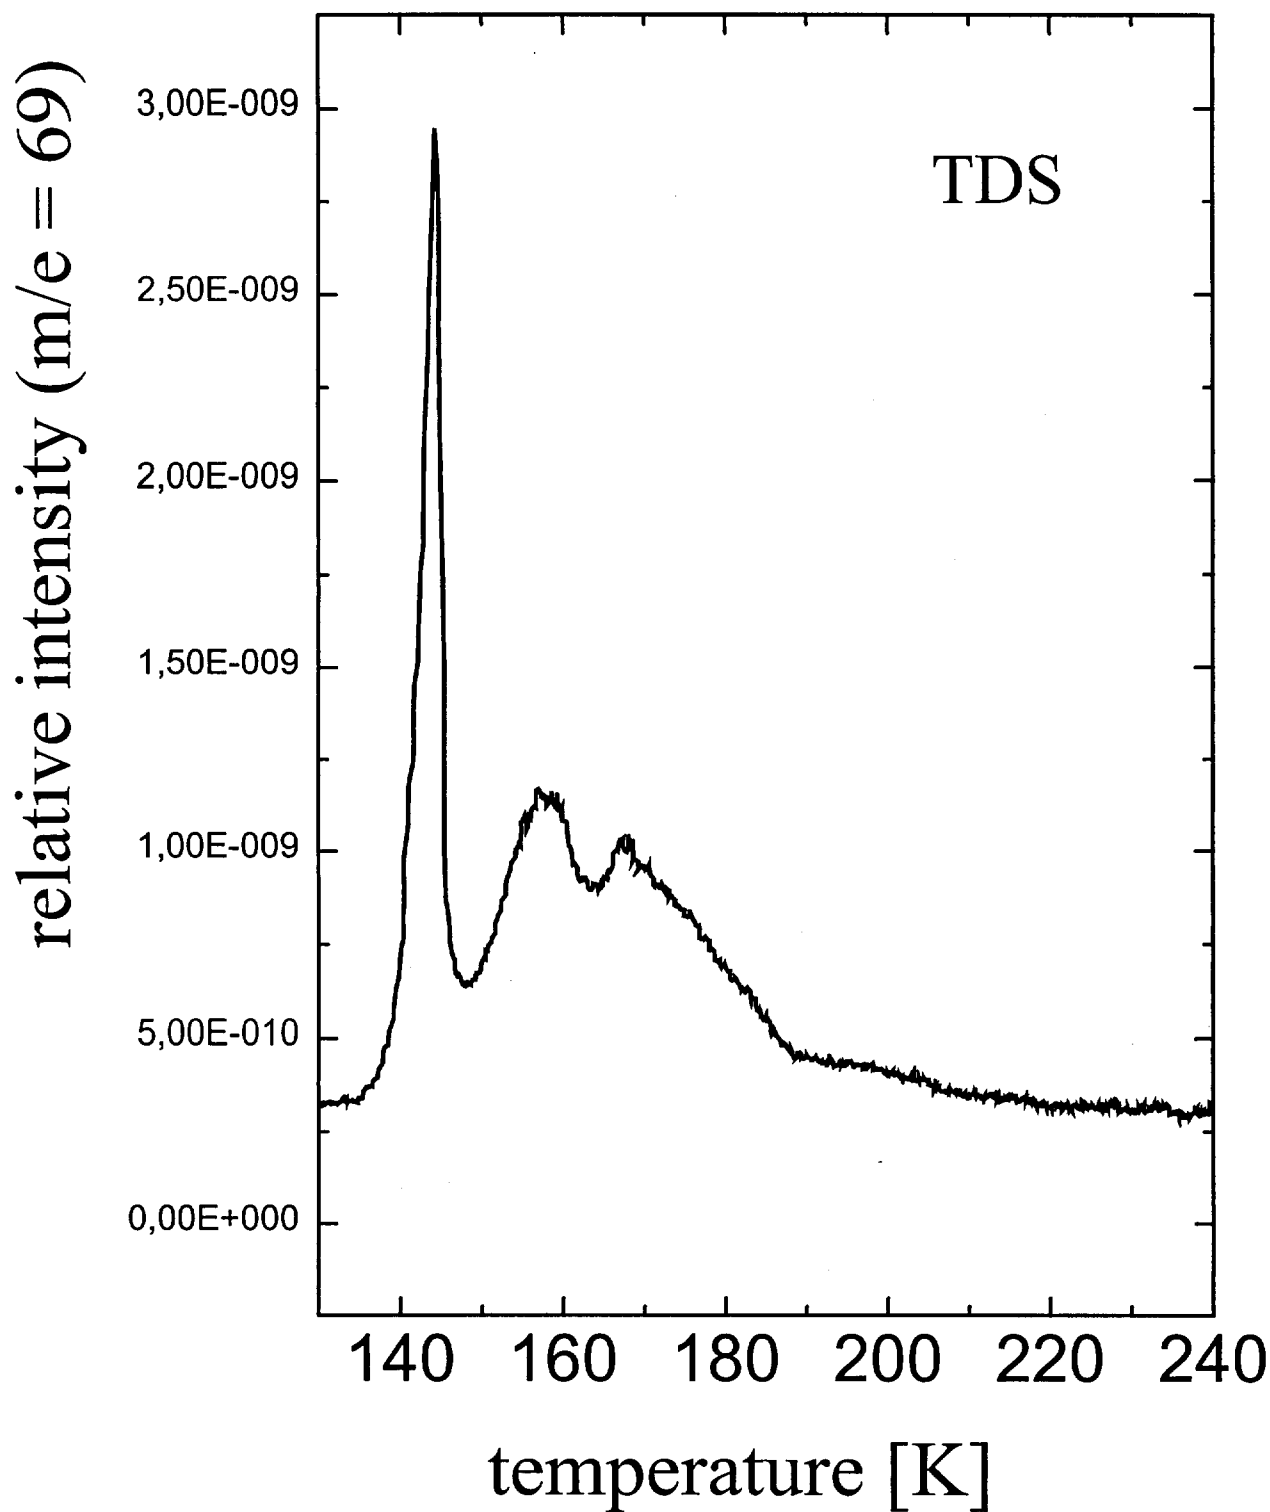

Supplement: Supplementary file 1 [file 5761041]
